# Supplementary material
Source: publisher site journal article supplement (https://www.dovepress.com/article/453794)
Supplement: Supplementary file 1 [file get_supplementary_file.php]

**Supplementary Table 1. Demographic and biochemical characteristics of patients from Donghai Branch and Licheng Branch.**

|  | **Donghai Branch** | | | | | **Licheng Branch** | | | | |
| --- | --- | --- | --- | --- | --- | --- | --- | --- | --- | --- |
| **Characteristics** | **Total**  **(n=695)** | **non-OSA (n=107)** | **OSA**  **(n=588)** | **statistic** | **p** | **Total**  **(n=197)** | **non-OSA**  **(n=34)** | **OSA (n=163)** | **statistic** | **p** |
|
| **Demographic**  **data**  Gender ,n(%) |  |  |  |  |  |  |  |  |  |  |
| Femal | 142(20.432) | 36(33.645) | 106(18.027) | 13.582 | <0.001 | 38(19.289) | 13(38.235) | 25(15.337) | 9.474 | 0.002 |
| Male | 553(79.568) | 71(66.355) | 482(81.973) |  |  | 159(80.711) | 21(61.765) | 138(84.663) |  |  |
| Age(years) ,median[IQR] | 49.000[39.000,58.000] | 45.000[34.000,53.000] | 49.000[39.000,58.000] | -3.176 | 0.001 | 49.000[37.000,58.000] | 45.000[34.000,60.000] | 49.000[38.000,58.000] | -1.058 | 0.29 |
| BMI(kg/m2) ,median[IQR] | 27.548[24.802,29.761] | 24.802[23.030,27.636] | 27.734[25.181,30.422] | -6.566 | <0.001 | 27.188[24.802,30.116] | 25.391[23.529,27.188] | 27.682[25.299,30.796] | -3.165 | 0.002 |
| **Biochemical indicators related to liver synthesis function** |  |  |  |  |  |  |  |  |  |  |
| TP (g/L),median[IQR] | 69.306±5.607 | 68.387±6.045 | 69.473±5.507 | -1.843 | 0.066 | 69.754±5.915 | 68.668±4.539 | 69.981±6.139 | -1.419 | 0.161 |
| ALB(g/L) ,median[IQR] | 44.500[41.700,47.100] | 44.100[41.300,47.200] | 44.500[41.800,47.100] | -0.951 | 0.342 | 45.300[42.700,47.000] | 45.300[42.700,46.600] | 45.100[42.600,47.200] | -0.274 | 0.785 |
| GLB(g/L) ,median[IQR] | 24.800[22.300,27.500] | 24.500[22.100,26.700] | 24.900[22.300,27.700] | -1.712 | 0.087 | 24.200[22.200,27.100] | 23.000[21.700,25.400] | 24.500[22.500,27.300] | -1.741 | 0.082 |
| ALB/GLB ,median[IQR] | 1.790[1.590,2.010] | 1.810[1.610,2.040] | 1.790[1.580,2.000] | 0.697 | 0.486 | 1.837±0.298 | 1.917±0.313 | 1.820±0.293 | 1.74 | 0.083 |
| **Biochemical indicators related to liver secretory function** |  |  |  |  |  |  |  |  |  |  |
| TBIL(umol/L) ,median[IQR] | 10.360[7.970,13.800] | 9.780[7.400,13.210] | 10.480[8.100,13.960] | -1.486 | 0.137 | 11.100[8.500,14.040] | 10.510[9.110,13.390] | 11.210[8.230,14.100] | -0.342 | 0.733 |
| DBIL(umol/L) ,median[IQR] | 4.060[3.070,5.100] | 4.140[3.000,4.810] | 4.030[3.080,5.160] | -0.519 | 0.604 | 4.200[3.090,5.280] | 3.850[3.290,5.000] | 4.200[3.070,5.300] | -0.286 | 0.776 |
| IBL(umol/L) ,median[IQR] | 6.380[4.610,8.710] | 5.910[4.140,8.000] | 6.430[4.700,8.780] | -1.831 | 0.067 | 6.960[4.900,9.120] | 6.690[5.570,9.600] | 7.050[4.790,9.120] | -0.078 | 0.939 |
| **Biochemical indicators related to liver function injuries** |  |  |  |  |  |  |  |  |  |  |
| AST (U/L),median[IQR] | 19.500[15.500,25.100] | 18.200[14.000,23.500] | 19.700[15.700,25.500] | -2.127 | 0.033 | 18.500[15.000,23.800] | 18.300[15.900,23.000] | 18.900[15.000,23.900] | 0.103 | 0.92 |
| ALT(U/L) ,median[IQR] | 25.400[17.500,38.500] | 22.000[14.500,31.800] | 25.900[18.000,40.500] | -2.834 | 0.005 | 23.400[16.500,36.100] | 20.600[15.600,36.800] | 24.000[16.600,36.000] | -0.42 | 0.676 |
| AST/ALT ,median[IQR] | 0.770[0.610,0.980] | 0.800[0.630,1.070] | 0.760[0.610,0.960] | 1.751 | 0.08 | 0.770[0.630,0.980] | 0.820[0.630,1.110] | 0.760[0.620,0.980] | 0.384 | 0.702 |
| ALP(U/L) ,median[IQR] | 72.800[61.100,86.200] | 70.000[60.000,82.100] | 73.000[61.400,87.000] | -1.143 | 0.253 | 70.000[60.000,85.900] | 65.100[55.200,80.400] | 70.600[61.000,88.400] | -1.539 | 0.124 |
| GGT(U/L) ,median[IQR] | 34.000[21.400,53.000] | 27.000[17.900,39.800] | 36.000[22.600,55.900] | -4.092 | <0.001 | 35.200[22.900,56.000] | 26.800[20.700,50.200] | 35.500[23.400,59.000] | -1.627 | 0.104 |
| **Biochemical indicators related to lipid metabolism** |  |  |  |  |  |  |  |  |  |  |
| CHO(mmol/L) ,median[IQR] | 4.740[4.030,5.500] | 4.700[3.840,5.390] | 4.750[4.050,5.510] | -1.462 | 0.144 | 4.840[4.080,5.520] | 4.510[3.710,5.250] | 4.920[4.100,5.690] | -1.655 | 0.098 |
| TG (mmol/L),median[IQR] | 1.600[1.140,2.320] | 1.390[1.000,1.850] | 1.670[1.170,2.390] | -4.158 | <0.001 | 1.660[1.280,2.390] | 1.400[0.980,2.000] | 1.680[1.300,2.570] | -2.361 | 0.018 |
| HDL-C(mmol/L),median[IQR] | 1.030[0.870,1.220] | 1.060[0.940,1.300] | 1.020[0.850,1.210] | 2.384 | 0.017 | 1.050[0.880,1.180] | 1.060[0.840,1.370] | 1.050[0.880,1.180] | 0.466 | 0.642 |
| LDL-C(mmol/L) ,median[IQR] | 3.000[2.400,3.640] | 3.000[2.400,3.540] | 3.000[2.400,3.670] | -0.609 | 0.542 | 3.026±0.939 | 2.825±0.843 | 3.068±0.952 | -1.376 | 0.17 |
| ApoA1(g/L) ,median[IQR] | 1.220[1.070,1.380] | 1.190[1.070,1.370] | 1.220[1.070,1.380] | 0.013 | 0.99 | 1.220[1.090,1.360] | 1.250[1.110,1.340] | 1.210[1.090,1.370] | 0.718 | 0.474 |
| ApoB(g/L) ,median[IQR] | 1.030[0.850,1.230] | 0.990[0.790,1.140] | 1.040[0.860,1.250] | -2.645 | 0.008 | 1.051±0.282 | 0.958±0.240 | 1.070±0.287 | -2.116 | 0.036 |
| ApoB/ApoA1 ,median[IQR] | 0.840[0.680,1.030] | 0.800[0.660,0.950] | 0.850[0.680,1.060] | -2.42 | 0.016 | 0.850[0.680,1.040] | 0.780[0.590,0.960] | 0.860[0.700,1.040] | -2.138 | 0.033 |
| **Biochemical indicators related to renal function injuries** |  |  |  |  |  |  |  |  |  |  |
| BUN(mmol/L) ,median[IQR] | 4.860[4.100,5.680] | 4.600[3.850,5.450] | 4.890[4.160,5.730] | -2.256 | 0.024 | 4.640[3.970,5.610] | 4.500[3.900,5.310] | 4.690[4.000,5.780] | -1.063 | 0.288 |
| SCr(umol/L) ,median[IQR] | 74.000[64.000,87.000] | 72.200[57.300,84.000] | 75.000[65.000,87.800] | -2.302 | 0.021 | 75.000[62.000,85.300] | 70.000[53.000,84.000] | 76.400[63.700,89.000] | -1.797 | 0.073 |
| UA(umol/L) ,median[IQR] | 404.000[342.000,462.000] | 387.000[316.000,434.000] | 406.000[346.000,465.000] | -2.677 | 0.007 | 403.645±102.440 | 359.559±94.622 | 412.840±101.614 | -2.799 | 0.006 |
| CO2(mmol/L) ,median[IQR] | 24.300[22.700,25.800] | 24.600[22.900,25.900] | 24.200[22.700,25.800] | 1.021 | 0.307 | 24.100[22.900,25.600] | 24.200[23.600,26.600] | 24.000[22.500,25.400] | 1.953 | 0.051 |
| OSM(mOsm/L) ,median[IQR] | 279.660[277.270,282.690] | 280.680[278.590,282.840] | 279.490[277.140,282.670] | 1.956 | 0.05 | 279.790[276.760,282.500] | 279.670[275.700,282.640] | 279.790[276.900,282.440] | 0.215 | 0.831 |
| AG(mmol/L) ,median[IQR] | 16.960[15.570,18.740] | 16.380[14.920,18.330] | 17.040[15.710,18.960] | -2.856 | 0.004 | 17.339±2.756 | 16.620±2.641 | 17.489±2.756 | -1.674 | 0.096 |
| **Biochemical indicators related to glucose metabolism** |  |  |  |  |  |  |  |  |  |  |
| GLU(mmol/L) ,median[IQR] | 5.430[4.990,6.270] | 5.200[4.790,5.570] | 5.550[5.010,6.320] | -4.06 | <0.001 | 5.550[5.060,6.450] | 5.310[4.710,6.030] | 5.580[5.110,6.500] | -1.827 | 0.068 |
| **Biochemical indicators related to myocardial injuries** |  |  |  |  |  |  |  |  |  |  |
| LDH(U/L) ,median[IQR] | 161.800[140.700,186.000] | 155.000[135.500,171.000] | 163.600[142.900,188.300] | -3.3 | <0.001 | 159.500[138.600,182.600] | 149.400[135.000,168.000] | 160.300[140.500,184.700] | -1.637 | 0.102 |
| CK(U/L) ,median[IQR] | 90.700[64.200,134.000] | 82.000[59.400,109.100] | 92.400[65.000,136.200] | -2.252 | 0.024 | 97.000[65.600,130.600] | 90.000[65.600,125.000] | 99.000[65.000,132.100] | -0.615 | 0.54 |
| CK-MB(U/L) ,median[IQR] | 12.800[10.500,15.600] | 12.300[10.000,15.000] | 12.900[10.600,15.600] | -1.566 | 0.117 | 13.100[10.700,15.500] | 12.000[9.200,14.100] | 13.500[10.800,16.000] | -2.221 | 0.026 |
| **Biochemical indicators related to insulin resistance** |  |  |  |  |  |  |  |  |  |  |
| TyG index ,median[IQR] | 8.900[8.520,9.330] | 8.610[8.290,9.040] | 8.950[8.560,9.380] | -5.129 | <0.001 | 8.940[8.570,9.440] | 8.590[8.440,9.210] | 8.950[8.630,9.480] | -2.624 | 0.009 |
| **PSG indicator** |  |  |  |  |  |  |  |  |  |  |
| AHI(e / h) ,median[IQR] | 20.100[8.200,42.700] | 1.800[1.000,3.100] | 25.700[12.900,46.900] | -16.468 | <0.001 | 18.400[6.700,40.500] | 2.600[1.000,4.100] | 23.600[11.900,48.100] | -9.163 | <0.001 |

**Abbreviations:** OSA, obstructive sleep apnea; IQR, interquartile range; BMI, body mass index; TP, total protein; ALB, albumin; GLB, globulin; ALB/GLB, albumin/globulin; TBIL, total bilirubin; DBIL, direct bilirubin; IBL, indirect bilirubin; AST, aspartate aminotransferase; ALT, alanine aminotransferase; AST/ALT, aspartate aminotransferase/alanine aminotransferase; ALP, alkaline phosphatase; GGT, r-glutamyl transpeptidase; CHO, cholesterol; TG, triglyceride; HDL-C, high density lipoprotein cholesterol; LDL-C, low density lipoprotein cholesterol; ApoA1, apolipoprotein A1; ApoB, apolipoprotein B; ApoB/ApoA1, apolipoprotein B/apolipoprotein A1; BUN, blood urea nitrogen; SCr, serum creatinine; UA, uric acid; OSM, osmotic pressure; AG, anion gap; GLU, glucose; LDH, lactate dehydrogenase; CK, creatine kinase; CK-MB, creatine kinase isoenzyme; TyG index, triglyceride-glucose index; PSG, polysomnography; AHI, apnea-hypopnea index.

**Supplementary Table 2. The results of collinearity analysis of each variables**

| variable | VIF |
| --- | --- |
| AST | 6.084 |
| TyG index | 5.248 |
| ALT | 4.828 |
| ApoB/ApoA1 | 4.323 |
| ApoB | 4.287 |
| TG | 2.804 |
| HDL-C | 2.564 |
| BUN | 2.325 |
| SCr | 2.264 |
| GLU | 1.931 |
| CK | 1.823 |
| GGT | 1.418 |
| LDH | 1.370 |
| Age | 1.369 |
| UA | 1.325 |
| Gender | 1.254 |
| BMI | 1.227 |
| AG | 1.095 |

**Abbreviations:** VIF, variance inflation factor; AST, aspartate aminotransferase; TyG index, triglyceride-glucose index; ALT, alanine aminotransferase; ApoB/ApoA1, apolipoprotein B/apolipoprotein A1; ApoB, apolipoprotein B; TG, triglyceride; HDL-C, high density lipoprotein cholesterol; BUN, blood urea nitrogen; SCr, serum creatinine; GLU, glucose; CK, creatine kinase; GGT: gamma-glutamyltransferase; LDH, lactate dehydrogenase; UA, uric acid; BMI, body mass index; AG, anion gap.

**Supplementary Table 3. Results of univariate and multivariate analysis**

| variable | OR | 95%CI | P-value | N_adjusted | OR_adjusted | 95%CI_adjusted | P-value_adjusted |
| --- | --- | --- | --- | --- | --- | --- | --- |
| Age | 1.028 | [1.011,1.045] | 0.001 | 695.0 | 1.026 | [1.008,1.044] | 0.004 |
| BMI | 1.217 | [1.143,1.295] | 0.000 | 695.0 | 1.215 | [1.142,1.293] | 0.000 |
| ALT | 1.008 | [0.998,1.019] | 0.103 | 695.0 | 1.008 | [0.998,1.018] | 0.121 |
| AST | 1.017 | [0.997,1.037] | 0.095 | 695.0 | 1.016 | [0.996,1.036] | 0.118 |
| GGT | 1.017 | [1.008,1.026] | 0.000 | 695.0 | 1.017 | [1.007,1.026] | 0.000 |
| TG | 1.671 | [1.275,2.188] | 0.000 | 695.0 | 1.673 | [1.278,2.190] | 0.000 |
| HDL-C | 0.447 | [0.215,0.931] | 0.031 | 695.0 | 0.471 | [0.226,0.979] | 0.044 |
| ApoB | 3.054 | [1.438,6.484] | 0.004 | 695.0 | 3.408 | [1.573,7.385] | 0.002 |
| ApoB/ApoA1 | 2.866 | [1.308,6.277] | 0.008 | 695.0 | 2.981 | [1.342,6.624] | 0.007 |
| BUN | 1.157 | [0.996,1.346] | 0.057 | 695.0 | 1.147 | [0.987,1.333] | 0.074 |
| SCr | 1.006 | [0.997,1.016] | 0.205 | 695.0 | 1.005 | [0.996,1.014] | 0.281 |
| UA | 1.003 | [1.001,1.006] | 0.002 | 695.0 | 1.003 | [1.001,1.006] | 0.003 |
| GLU | 1.388 | [1.148,1.678] | 0.001 | 695.0 | 1.439 | [1.175,1.762] | 0.000 |
| LDH | 1.009 | [1.003,1.016] | 0.003 | 695.0 | 1.009 | [1.003,1.016] | 0.004 |
| CK | 1.001 | [0.999,1.004] | 0.357 | 695.0 | 1.001 | [0.999,1.004] | 0.359 |
| AG | 1.113 | [1.027,1.206] | 0.009 | 695.0 | 1.106 | [1.020,1.199] | 0.015 |
| TyG index | 2.520 | [1.737,3.658] | 0.000 | 695.0 | 2.495 | [1.720,3.619] | 0.000 |
| Gender |  |  |  |  |  |  |  |
| Female |  |  |  | 142.0 |  |  |  |
| Male | 2.306 | [1.466,3.626] | 0.000 | 553.0 | 2.324 | [1.474,3.665] | 0.000 |

**Abbreviations:** OR, odd ratio; CI, confidence interval;BMI, body mass index; ALT, alanine aminotransferase; AST, aspartate aminotransferase; GGT: gamma-glutamyltransferase; TG, triglyceride; HDL-C, high density lipoprotein cholesterol; ApoB, apolipoprotein B; ApoB/ApoA1, apolipoprotein B/apolipoprotein A1; BUN, blood urea nitrogen; SCr, serum creatinine; UA, uric acid; GLU, glucose; LDH, lactate dehydrogenase; CK, creatine kinase; AG, anion gap; TyG index, triglyceride-glucose index.

**Supplementary Table 4. The ROC curve parameters of each variable for the identification of OSA and non-OSA**

| variable | AUC | sensitivity | specificity | youden index | optimal threshold |
| --- | --- | --- | --- | --- | --- |
| **Demographic variable** |  |  |  |  |  |
| Gender | 0.578 | 0.82 | 0.336 | 0.156 | 1 |
| Age | 0.596 | 0.692 | 0.449 | 0.141 | 43 |
| BMI | 0.699 | 0.679 | 0.645 | 0.323 | 26.122 |
| **Biochemical indicators related to liver function injuries** |  |  |  |  |  |
| GGT | 0.624 | 0.631 | 0.579 | 0.21 | 28.7 |
| **Biochemical indicators related to lipid metabolism** |  |  |  |  |  |
| HDL-C | 0.572 | 0.879 | 0.26 | 0.139 | 0.87 |
| TG | 0.626 | 0.536 | 0.692 | 0.227 | 1.6 |
| ApoB/ApoA1 | 0.573 | 0.252 | 0.897 | 0.149 | 1.06 |
| ApoB | 0.58 | 0.367 | 0.804 | 0.171 | 1.16 |
| **Biochemical indicators related to renal function injuries** |  |  |  |  |  |
| UA | 0.581 | 0.35 | 0.794 | 0.145 | 440 |
| AG | 0.587 | 0.707 | 0.458 | 0.165 | 15.98 |
| **Biochemical indicators related to glucose metabolism** |  |  |  |  |  |
| GLU | 0.623 | 0.49 | 0.757 | 0.247 | 5.58 |
| **Biochemical indicators related to myocardial injuries** |  |  |  |  |  |
| LDH | 0.6 | 0.464 | 0.738 | 0.203 | 168.1 |
| **Biochemical indicators related to insulin resistance** |  |  |  |  |  |
| TyG index | 0.656 | 0.658 | 0.598 | 0.256 | 8.73 |

**Abbreviations:** ROC, receiver operating characteristic; AUC, area under the receiver operating characteristic curve; BMI, body mass index; GGT, gamma-glutamyltransferase; HDL-C, high density lipoprotein cholesterol; ApoB/ApoA1, apolipoprotein B/apolipoprotein A1; ApoB, apolipoprotein B; UA, uric acid; AG, anion gap; GLU, glucose; LDH, lactate dehydrogenase; TyG index, triglyceride-glucose index.

**Supplementary Table 5. parameters of four models**

| Model | model parameter |
| --- | --- |
| Logistic Regression | C: 1.0 max_iter: 100 penalty: l2 tol: 0.0001 |
| Gaussian Naive Bayes | priors: None var_smoothing: 1e-09 |
| Support Vector Machine | C: 1.0 kernel: rbf tol: 0.001 |
| K Neighbors Classifier | n_neighbors: 5 weights: uniform |

**Supplementary Table 6. Summary of the results of the training cohort of the four models**

| Model | AUC(SD) | cutoff(SD) | accuracy(SD) | sensitivity(SD) | specificity(SD) | positive prediction value(SD) | negative prediction value(SD) | F1 score(SD) |
| --- | --- | --- | --- | --- | --- | --- | --- | --- |
| LR | 0.799(0.019) | 0.812(0.037) | 0.763(0.058) | 0.781(0.080) | 0.684(0.079) | 0.931(0.014) | 0.373(0.047) | 0.846(0.049) |
| GNB | 0.763(0.019) | 0.403(0.152) | 0.684(0.056) | 0.676(0.076) | 0.737(0.063) | 0.933(0.009) | 0.303(0.035) | 0.781(0.051) |
| SVM | 0.800(0.026) | 0.844(0.012) | 0.736(0.046) | 0.739(0.061) | 0.734(0.060) | 0.938(0.012) | 0.345(0.045) | 0.825(0.037) |
| KNN | 0.883(0.010) | 0.960(0.080) | 0.243(0.191) | 0.646(0.118) | 0.938(0.125) | NaN(NaN) | 0.179(0.063) | NaN(NaN) |

**Abbreviations:** LR, logistic regression; GNB, Gaussian Naive Bayes; SVM, Support Vector Machine; KNN, K-NearestNeighbor; AUC, area under the receiver operating characteristic curve.

**Supplementary Table 7. Summary of the results of the validation cohort of the fourl models**

| Model | AUC(SD) | cutoff(SD) | accuracy(SD) | sensitivity(SD) | specificity(SD) | positive prediction value(SD) | negative prediction value(SD) | F1 score(SD) |
| --- | --- | --- | --- | --- | --- | --- | --- | --- |
| LR | 0.771(0.042) | 0.812(0.037) | 0.729(0.065) | 0.793(0.081) | 0.670(0.107) | 0.922(0.026) | 0.319(0.052) | 0.851(0.050) |
| GNB | 0.756(0.039) | 0.403(0.152) | 0.668(0.065) | 0.678(0.091) | 0.764(0.112) | 0.931(0.025) | 0.263(0.040) | 0.780(0.064) |
| SVM | 0.723(0.035) | 0.844(0.012) | 0.688(0.051) | 0.659(0.121) | 0.727(0.129) | 0.907(0.027) | 0.269(0.042) | 0.758(0.089) |
| KNN | 0.641(0.031) | 0.960(0.080) | 0.236(0.135) | 0.686(0.146) | 0.542(0.156) | NaN(NaN) | 0.168(0.014) | NaN(NaN) |

**Abbreviations:** LR, logistic regression; GNB, Gaussian Naive Bayes; SVM, Support Vector Machine; KNN, K-NearestNeighbor; AUC, area under the receiver operating characteristic curve.
